# Supplementary material for: Uncovering Intrinsic Modular Organization of Spontaneous Brain Activity in Humans
Source: PLOS journal article supplement (doi:10.1371/journal.pone.0005226), 2009-04-20
Supplement: S2 (10.1371/journal.pone.0005226.s002) [file journal.pone.0005226.s002]

## Text S2: Small-World Properties and Efficiency Measurements

In this study, we calculated small-world parameters and efficiency measurements of the brain networks [1-3]. For a graph  $G$  (network) with  $N$  nodes and  $K$  edges, its average clustering coefficient,  $C_p$  and characteristic path length,  $L_p$  are computed as

$$C_p(G) = \frac{1}{N} \sum_{i \in G} \frac{2E_{G_i}}{N_{G_i}(N_{G_i} - 1)},$$

$$L_p(G) = \frac{1}{N(N-1) \sum_{i \in G} \sum_{j \neq i \in G} \frac{1}{d_{ij}}}.$$

where  $N_{G_i}$  and  $E_{G_i}$  denote the number of nodes and edges within the subgraph  $G_i$  composed of neighbors of node  $i$ , and  $d_{ij}$  the minimum number of edges required to travel from node  $i$  to  $j$ . Similar to the  $C_p$  and  $L_p$ , local ( $E_{loc}$ ) and global ( $E_{glob}$ ) efficiency measurements of the graph  $G$  are computed as

$$E_{loc}(G) = \frac{1}{N} \sum_{i \in G} E_{loc}(i), \quad E_{glob}(G) = \frac{1}{N} \sum_{i \in G} E_{glob}(i),$$

where

$$E_{loc}(i) = \frac{1}{N_{G_i}(N_{G_i} - 1)} \sum_{j \neq i \in G_i} \frac{1}{d_{ij}}, \quad E_{glob}(i) = \frac{1}{N-1} \sum_{j \neq i \in G} \frac{1}{d_{ij}},$$

A real network would be small-world if it meets the following conditions [2,3]:

$$C_p^{real} \gg C_p^{random}, L_p^{real} \approx L_p^{random} \quad \text{or} \quad E_{loc}^{real} \gg E_{loc}^{random}, E_{glob}^{real} \approx E_{glob}^{random}$$

where  $C_p^{random}, L_p^{random}, E_{loc}^{random}, E_{glob}^{random}$  are obtained by calculating the mean values of 100 node- and degree-matched random networks [4].

## References:

1. Newman MEJ (2003) The structure and function of complex networks. SIAM Review 45: 167–256.
2. Watts DJ, Strogatz SH (1998) Collective dynamics of 'small-world' networks. Nature 393: 440-442.
3. Latora V, Marchiori M (2001) Efficient behavior of small-world networks. Phys Rev Lett 87: 198701.
4. Maslov S, Sneppen K (2002) Specificity and stability in topology of protein networks. Science 296: 910-913.
