# Supplementary material for: Uncovering Intrinsic Modular Organization of Spontaneous Brain Activity in Humans
Source: PLOS journal article supplement (doi:10.1371/journal.pone.0005226), 2009-04-20
Supplement: S12 (10.1371/journal.pone.0005226.s012) [file journal.pone.0005226.s012]

**Table S4.** Global Properties of the Human Brain Functional Networks (Spatial Scale)

| Threshold, <i>S</i> | <i>N</i> | <i>K</i> | $\langle k \rangle$ | $C_p$               | $L_p$               | $E_{loc}$           | $E_{glob}$          |
|---------------------|----------|----------|---------------------|---------------------|---------------------|---------------------|---------------------|
| 8.41%               | 90       | 337      | 7.49                | 0.50<br>(0.11±0.01) | 2.86<br>(2.28±0.02) | 0.63<br>(0.17±0.02) | 0.35<br>(0.44±0.00) |
| 10.79%              | 90       | 432      | 9.60                | 0.55<br>(0.14±0.01) | 2.38<br>(2.02±0.01) | 0.70<br>(0.24±0.02) | 0.42<br>(0.49±0.00) |
| 12.16%              | 90       | 487      | 10.82               | 0.57<br>(0.16±0.01) | 2.21<br>(1.94±0.01) | 0.73<br>(0.29±0.02) | 0.45<br>(0.52±0.00) |
| 15.38%              | 90       | 616      | 13.69               | 0.55<br>(0.19±0.01) | 1.97<br>(1.81±0.00) | 0.74<br>(0.40±0.02) | 0.51<br>(0.55±0.00) |
| 16.78%              | 90       | 672      | 14.93               | 0.53<br>(0.20±0.01) | 1.90<br>(1.76±0.00) | 0.73<br>(0.44±0.01) | 0.53<br>(0.57±0.00) |

*S* indicates the network sparsity thresholds that are used to construct spatial brain functional networks (see Materials and Methods). *N* and *K* are the number of nodes and edges in the brain networks, respectively.  $\langle k \rangle$ ,  $C_p$ ,  $L_p$ ,  $E_{loc}$  and  $E_{glob}$  denote the average degree, clustering coefficient, characteristic path length, local and global efficiency, respectively. The values in bracket indicate the corresponding topological parameters derived from 100 node- and degree-matched random networks. The spatial brain functional networks were found to have a small-world structure as they had an almost identical path length ( $L_p^{brain}/L_p^{random} \sim 1$ ) but were more locally clustered ( $C_p^{brain}/C_p^{random} \gg 1$ ) under multiple statistical thresholds in comparison with the matched random networks.
